# Supplementary material for: Organic Matter Assessment and Paleoenvironmental Changes of the Middle Jurassic Main Source Rocks (Khatatba Formation) in the North Western Desert, Egypt: Palynofacies and Palynomorph Perspectives
Source: MDPI journal article supplement (doi:10.3390/min13040548), 2023-04-13
Supplement: s1 [file s1]

Archive with 3 entries (3 files):
- minerals-2299934 - Supplementary Figure S1 xml.pdf
- minerals-2299934 - Table S1 xml.xlsx
- minerals-2299934 - Table S2 xml.xlsx
