# Supplementary material for: Organic Matter Assessment and Paleoenvironmental Changes of the Middle Jurassic Main Source Rocks (Khatatba Formation) in the North Western Desert, Egypt: Palynofacies and Palynomorph Perspectives
Source: MDPI journal article supplement (doi:10.3390/min13040548), 2023-04-13
Supplement: s1 [file s1 › minerals-2299934 - Table S1 xml.xlsx]

## Sheet: Sheet1
		Spores																								Pollen grains												Dinoflagellate cysts
	Depth (m)	Deltoidospora sp.	Deltoidospora minor	Deltoidospora hallii	Deltoidospora toralis	Deltoidospora mesozoica	Cicatricosisporites sp.	Concavisporites sp.	Concavissimisporites punctatus	Concavissimisporites variverrucatus	Concavissimisporites sp.	Cyathidites australis	Cyathidites minor	Cyathidites sp.	Biretisporites potoniei	Impardecispora sp.	Gleicheniidites senonicus	Gleicheniidites sp.	Microreticulatisporites uniformis	Pilosisporites sp.	Todisporites minor	Triplanosporites sp.	Verrucosisporites sp.	Dictyophyllidites sp.	total spores	Inaperturopollenites sp	Araucariacites australis	Spheripollenites psilatus	Callialasporites dampieri.	Callialasporites turbatus	Callialasporites trilobatus	Ephedripites sp.	Classopollis sp.	Cycadopites sp.	Cycadopites ovatus	Dyad pollen)Classopollis sp.)	total pollen grains	Adnatosphaeridium caulleryi	Subtilisphaera sp.	Subtilisphaera perlucida	Xiphophiridium alatum	Meiourogonyaulax caytonensis	Millioudodinium globatum	Muderongia simplex	Oligosphaeridium sp.	Gonyaulacysta adecta	Systematophora areolata	Systematophora complicata	Systematophora penicillata
OBA D-8 well, Matruh Basin	3750	0	0	0	0	0	0	0	0	0	0	0	0	0	0	0	0	0	0	0	0	0	0	0	0	11	0	0	0	0	6	0	0	0	0	0	17	4	0	0	0	0	9	0	0	0	0	0	0
	3760	0	0	0	0	0	0	0	0	0	0	0	0	0	0	0	0	0	0	0	0	0	0	0	0	3	0	0	0	0	0	0	0	0	0	0	3	5	0	0	0	0	2	0	0	0	1	2	0
	3790	0	0	0	0	0	0	0	0	0	0	0	0	0	0	0	0	0	0	0	0	0	0	0	0	6	0	0	0	0	0	0	0	0	0	0	6	3	0	0	0	0	6	0	0	0	5	5	0
	3800	0	0	0	0	0	0	0	0	0	0	0	0	0	0	0	0	0	0	0	0	0	0	0	0	5	0	0	0	0	0	0	0	0	0	0	5	2	0	0	0	0	4	0	0	0	1	5	0
	3810	0	0	0	0	0	0	0	0	0	0	0	0	0	0	0	0	0	0	0	0	0	0	0	0	14	0	0	0	0	5	0	0	0	0	0	19	5	0	0	0	0	5	0	0	0	5	3	0
	3820	0	0	0	0	0	0	0	0	0	0	0	0	0	0	0	0	0	0	0	0	0	0	0	0	4	0	0	0	0	0	0	0	0	0	0	4	0	0	0	0	0	0	0	0	0	1	6	0
	3845	0	0	0	0	0	0	0	0	0	0	0	0	0	0	0	0	0	0	0	0	0	0	0	0	2	0	0	0	0	0	0	0	0	0	0	2	0	0	0	0	0	0	0	0	0	0	0	0
	3860	0	0	0	0	0	0	0	0	0	0	0	0	0	0	0	0	0	0	0	0	0	0	0	0	0	0	0	0	0	0	0	0	0	0	0	0	0	0	0	0	0	0	0	0	0	0	0	0
	3880	0	0	0	0	0	0	0	0	0	0	0	0	0	0	0	0	0	0	0	0	0	0	0	0	0	0	0	0	0	0	0	0	0	0	0	0	0	0	0	0	0	0	0	0	0	0	0	0
	3900	0	0	0	0	0	0	0	0	0	0	0	0	0	0	0	0	0	0	0	0	0	0	0	0	0	0	0	0	0	0	0	0	0	0	0	0	0	0	0	0	0	0	0	0	0	0	0	0
	3915	0	0	0	0	0	0	0	0	0	0	0	0	0	0	0	0	0	0	0	0	0	0	0	0	0	0	0	0	0	0	0	0	0	0	0	0	0	0	0	0	0	0	0	0	0	0	0	0
	3920	0	0	0	0	0	0	0	0	0	0	0	0	0	0	0	0	0	0	0	0	0	0	0	0	0	0	0	0	0	0	0	0	0	0	0	0	0	0	0	0	0	0	0	0	0	0	0	0
	3930	0	0	0	0	0	0	0	0	0	0	0	0	0	0	0	0	0	0	0	0	0	0	0	0	0	0	0	0	0	0	0	0	0	0	0	0	0	0	0	0	0	0	0	0	0	0	0	0
	3940	0	0	0	0	0	0	0	0	0	0	0	0	0	0	0	0	0	0	0	0	0	0	0	0	0	0	0	0	0	0	0	0	0	0	0	0	0	0	0	0	0	0	0	0	0	0	0	0
	4015	0	0	0	0	0	0	0	0	0	0	0	0	0	0	0	0	0	0	0	0	0	0	0	0	0	0	0	0	0	0	0	0	0	0	0	0	0	0	0	0	0	0	0	0	0	0	0	0
OBA D-10 well, Matruh Basin	3904	55	10	0	5	8	0	0	0	0	0	0	0	0	0	0	5	12	0	0	0	0	3	2	100	18	0	9	0	0	1	0	0	12	0	0	40	0	0	0	0	0	0	0	1	1	5	2	0
	3906	59	5	0	4	0	0	0	0	0	0	0	0	0	0	0	5	10	0	0	0	0	0	1	84	22	0	12	0	0	2	5	0	1	0	0	42	0	0	0	0	0	0	0	2	0	3	1	0
	3908	54	12	0	5	2	0	0	0	0	0	0	0	0	0	0	4	8	0	0	0	0	2	2	89	5	0	11	0	0	2	3	0	2	0	0	23	0	0	0	0	0	0	0	0	1	6	1	0
	3910	60	5	0	2	1	0	0	0	0	0	0	0	0	0	0	0	0	0	0	0	0	0	0	68	18	0	6	0	0	5	6	0	3	0	0	38	0	0	0	0	0	0	0	0	2	0	6	0
	3912	56	10	0	0	2	0	0	0	0	0	0	0	0	0	0	5	5	0	0	0	0	2	6	86	20	0	13	0	0	3	3	0	5	0	0	44	3	0	0	0	0	0	0	1	0	0	0	0
	3914	55	2	0	3	5	0	0	0	0	0	0	0	0	0	0	5	0	0	0	0	0	0	0	70	13	0	11	0	0	0	8	0	10	0	0	42	2	0	0	0	0	0	0	2	2	0	0	0
	3916	45	12	0	5	1	0	0	0	0	0	0	0	0	0	0	2	2	0	0	0	0	2	5	74	22	0	2	0	0	0	10	0	2	0	0	36	1	0	0	0	0	0	0	0	0	2	1	0
	3918	20	10	0	5	2	0	0	0	0	0	0	0	0	0	0	0	0	0	0	0	0	0	0	37	17	0	13	0	0	0	6	0	1	0	0	37	5	0	0	0	0	0	0	0	0	2	1	0
	3924	23	15	0	0	5	0	0	0	0	0	0	0	0	0	0	0	0	0	0	0	0	0	5	48	19	0	11	0	0	0	0	0	2	0	0	32	3	0	0	0	0	0	0	0	0	0	4	0
	3926	21	10	0	0	0	0	0	0	0	0	0	0	0	0	0	0	0	0	0	0	0	0	0	31	36	0	5	0	0	0	0	0	6	0	0	47	1	0	0	0	0	0	0	2	0	1	3	0
	3928	15	5	0	5	6	0	0	0	0	0	0	0	0	0	0	1	10	0	0	0	0	2	5	49	17	0	5	0	0	0	0	0	3	0	0	25	0	0	0	0	0	0	0	0	0	0	0	0
	3938	25	5	0	2	0	0	0	0	0	0	0	0	0	0	0	0	0	0	0	0	0	0	0	32	9	0	12	0	0	0	0	0	0	0	0	21	2	0	0	0	0	0	0	0	0	0	0	0
	3940	32	10	0	5	3	0	0	0	0	0	0	0	0	0	0	0	2	0	0	0	0	5	0	57	5	0	6	0	0	0	0	0	0	0	0	11	1	0	0	0	0	0	0	0	0	0	0	0
	3966	12	5	0	0	0	0	0	0	0	0	0	0	0	0	0	0	0	0	0	0	0	0	0	17	12	0	14	0	0	0	0	0	0	0	0	26	0	0	0	0	0	0	0	0	0	0	0	0
	3968	17	5	0	2	0	0	0	0	0	0	0	0	0	0	0	0	0	0	0	0	0	0	0	24	17	0	18	0	0	0	0	0	0	0	0	35	0	0	0	0	0	0	0	0	0	0	0	0
	3970	23	5	0	3	0	0	0	0	0	0	0	0	0	0	0	0	3	0	0	0	0	3	1	38	8	0	14	0	0	0	0	0	0	0	0	22	0	0	0	0	0	0	0	0	0	0	0	0
	3972	31	10	0	0	3	0	0	0	0	0	0	0	0	0	0	3	2	0	0	0	0	2	0	51	10	0	20	0	0	0	0	0	3	0	0	33	0	0	0	0	0	0	0	0	0	0	0	0
	3974	12	2	0	1	0	0	0	0	0	0	0	0	0	0	0	0	0	0	0	0	0	0	0	15	11	0	10	3	0	0	0	0	2	0	0	26	0	0	0	0	0	0	0	0	0	0	0	0
	3976	16	3	0	3	0	0	0	0	0	0	0	0	0	0	0	0	0	0	0	0	0	0	0	22	13	0	5	3	0	0	0	0	2	0	0	23	0	0	0	0	0	0	0	0	0	0	0	0
	3988	12	2	0	0	0	0	0	0	0	0	0	0	0	0	0	0	0	0	0	0	0	0	0	14	5	0	8	0	0	0	0	0	0	0	0	13	0	1	0	0	0	0	0	0	0	0	0	0
	3990	5	0	0	0	0	0	0	0	0	0	0	0	0	0	0	0	0	0	0	0	0	0	0	5	5	0	9	3	0	0	0	0	0	0	0	17	0	3	0	0	0	0	0	0	0	0	0	0
	3996	3	0	0	0	0	0	0	0	0	0	0	0	0	0	0	0	0	0	0	0	0	0	0	3	6	0	6	3	0	0	0	0	0	0	0	15	0	5	0	0	0	0	0	2	0	0	0	0
	3998	3	0	0	0	0	0	0	0	0	0	0	0	0	0	0	0	0	0	0	0	0	0	0	3	1	0	13	5	0	0	0	0	2	0	0	21	0	0	0	0	0	0	0	0	0	0	0	0
OBA D-17 well, Matruh Basin	3760	0	0	0	0	0	0	0	0	0	0	0	0	0	0	0	0	0	0	0	0	0	0	0	0	10	0	0	0	0	0	0	0	0	0	0	10	0	0	0	0	0	0	0	0	0	5	0	0
	3780	0	0	0	0	0	0	0	0	0	0	0	0	0	0	0	0	0	0	0	0	0	0	0	0	8	0	0	0	0	0	0	0	0	0	0	8	0	0	0	0	5	0	0	0	0	4	0	0
	3800	8	0	0	0	0	0	0	0	0	0	0	0	0	0	0	0	0	0	0	0	0	0	0	8	6	0	0	0	0	0	0	0	0	0	0	6	0	0	0	0	1	0	0	0	0	0	0	0
	3810	9	0	0	0	0	0	0	0	0	0	0	0	0	0	0	0	0	0	0	0	0	0	0	9	11	0	0	0	0	0	0	0	0	0	0	11	4	0	0	0	1	0	0	0	0	0	0	0
	3830	7	0	0	0	0	0	0	0	0	0	0	0	0	0	0	0	0	0	0	0	0	0	0	7	7	0	0	0	0	0	0	0	0	0	0	7	1	0	0	0	1	0	0	0	0	0	0	0
	3850	9	0	0	0	0	0	0	0	0	0	0	0	0	0	0	0	0	0	0	0	0	0	0	9	9	0	0	0	0	0	0	0	0	0	0	9	1	0	0	0	0	0	0	0	0	0	0	0
	3870	0	0	0	0	0	0	0	0	0	0	0	0	0	0	0	0	0	0	0	0	0	0	0	0	8	0	0	0	0	0	0	0	0	0	0	8	1	4	0	0	0	0	0	0	0	0	0	3
	3900	0	0	0	0	0	0	0	0	0	0	0	0	0	0	0	0	0	0	0	0	0	0	0	0	5	0	0	0	0	0	0	0	0	0	0	5	0	0	0	0	0	0	0	0	0	0	0	1
	3920	0	0	0	0	0	0	0	0	0	0	0	0	0	0	0	0	0	0	0	0	0	0	0	0	10	0	0	0	0	0	0	0	0	0	0	10	0	0	0	0	0	0	0	0	0	0	0	0
	3935	0	0	0	0	0	0	0	0	0	0	0	0	0	0	0	0	0	0	0	0	0	0	0	0	0	0	0	0	0	0	0	0	0	0	0	0	0	0	0	0	0	0	0	0	0	0	0	0
	3960	0	0	0	0	0	0	0	0	0	0	0	0	0	0	0	0	0	0	0	0	0	0	0	0	0	0	0	0	0	0	0	0	0	0	0	0	0	0	0	0	0	0	0	0	0	0	0	0
	3970	0	0	0	0	0	0	0	0	0	0	0	0	0	0	0	0	0	0	0	0	0	0	0	0	0	0	0	0	0	0	0	0	0	0	0	0	0	0	0	0	0	0	0	0	0	0	0	0
	3992	0	0	0	0	0	0	0	0	0	0	0	0	0	0	0	0	0	0	0	0	0	0	0	0	0	0	0	0	0	0	0	0	0	0	0	0	0	0	0	0	0	0	0	0	0	0	0	0
	4000	0	0	0	0	0	0	0	0	0	0	0	0	0	0	0	0	0	0	0	0	0	0	0	0	0	0	0	0	0	0	0	0	0	0	0	0	0	0	0	0	0	0	0	0	0	0	0	0
THAX-1 well, Dahab-Mireir Basin	3771	66	20	0	0	0	2	25	0	0	0	0	0	0	0	0	0	22	0	0	0	0	0	0	135	20	0	10	0	0	5	0	0	0	5	0	40	0	0	0	2	0	0	1	0	2	0	0	0
	3777	49	10	0	0	0	0	10	0	0	0	0	0	0	0	0	0	10	0	0	0	0	0	1	80	10	0	27	0	0	5	0	0	0	3	0	45	0	0	2	0	0	0	0	0	1	0	0	0
	3786	82	11	0	0	0	2	8	0	0	0	0	0	0	0	0	0	9	0	0	0	0	0	2	114	5	0	12	0	0	2	0	0	0	10	0	29	0	0	0	0	0	0	0	0	5	0	0	0
	3795	40	0	0	0	0	0	0	0	0	0	0	0	0	0	0	0	5	0	0	0	0	0	0	45	5	0	11	0	0	0	0	0	0	5	0	21	0	0	0	0	0	0	0	0	2	1	0	0
	3807	80	10	0	0	0	4	0	0	0	0	0	0	0	0	0	1	6	0	0	0	0	0	2	103	4	0	10	0	0	0	0	0	0	5	0	19	0	0	0	0	0	0	0	0	1	9	2	0
	3822	70	20	0	0	0	2	0	0	0	0	0	0	0	0	0	0	21	0	0	0	0	0	0	113	10	0	20	0	0	0	10	0	0	1	0	41	0	0	0	0	0	0	0	0	0	5	0	0
	3849	91	20	0	0	0	0	0	0	0	0	0	0	0	0	0	1	30	0	0	0	0	0	2	144	15	0	15	0	0	0	0	0	0	2	0	32	0	0	0	0	0	0	0	0	0	0	0	0
	3858	70	30	0	0	0	0	0	0	0	0	0	0	0	0	0	5	10	0	0	0	0	0	6	121	15	0	30	0	0	0	2	0	0	2	0	49	0	0	0	0	0	0	0	0	0	2	1	0
	3873	30	0	0	0	0	0	0	0	0	0	0	0	0	0	0	0	12	0	0	0	0	0	0	42	0	0	5	0	0	0	0	0	0	1	0	6	0	0	0	0	0	0	0	0	0	5	2	0
	3890	100	12	0	0	0	5	0	0	0	0	0	0	0	0	0	2	11	0	0	0	0	0	0	130	25	0	5	0	0	2	0	0	0	0	0	32	0	0	0	0	0	0	0	0	0	0	0	0
	3894	89	30	0	0	0	0	0	0	0	0	0	0	0	0	0	0	15	0	0	0	0	0	6	140	25	0	0	0	0	0	0	0	0	0	0	25	0	0	0	0	0	0	0	0	0	0	0	0
	3909	80	20	0	0	0	0	5	0	0	0	0	0	0	0	7	2	11	0	0	0	0	0	0	125	40	0	15	0	0	0	0	0	0	0	0	55	0	0	0	0	0	0	0	0	0	0	0	0
	3924	60	23	0	0	0	0	12	0	0	0	0	0	0	0	0	5	6	0	0	0	0	0	10	116	30	0	25	0	0	0	0	0	0	0	0	55	0	0	0	0	0	0	0	0	0	1	2	0
	3930	73	25	0	0	0	0	0	0	0	0	0	0	0	0	0	1	14	0	0	0	0	0	11	124	23	0	20	0	0	0	0	0	0	20	0	63	0	0	0	0	0	0	0	0	0	5	2	0
	3942	66	20	0	0	0	0	5	0	0	0	0	0	0	0	0	2	12	0	0	0	0	0	12	117	33	0	20	0	0	0	0	0	0	5	0	58	0	0	0	0	0	0	0	0	0	0	0	0
	3966	103	0	0	0	0	0	0	0	0	0	0	0	0	0	0	0	1	0	0	0	0	0	1	105	15	0	9	0	0	0	0	0	0	6	0	30	0	0	0	0	0	0	0	0	0	0	0	0
	3972	70	10	0	0	0	0	0	0	0	0	0	0	0	0	0	7	10	0	0	0	0	0	13	110	30	0	10	0	0	0	0	0	0	11	0	51	0	0	0	0	0	0	0	0	0	0	0	0
	3990	96	12	0	0	0	0	0	0	0	0	0	0	0	0	0	1	12	0	0	0	0	0	2	123	25	0	15	0	0	0	0	0	0	0	0	40	0	0	0	0	0	0	0	0	0	0	0	0
	4008	10	0	0	0	0	0	0	0	0	0	0	0	0	0	0	9	10	0	0	0	0	0	0	29	0	0	0	0	0	0	0	0	0	0	0	0	0	0	0	0	0	0	0	0	0	0	0	0
	4020	93	20	0	0	0	0	0	0	0	0	0	0	0	0	0	0	0	0	0	0	0	0	3	116	6	0	35	0	0	0	0	0	0	0	0	41	0	0	0	0	0	0	0	0	0	0	0	0
	4038	60	10	0	0	0	0	0	0	0	0	0	0	0	0	0	12	8	0	0	0	0	0	10	100	13	0	11	0	0	0	0	0	0	11	0	35	0	0	0	0	0	0	0	0	0	2	2	0
	4041	67	9	0	0	0	0	2	0	0	0	0	0	0	0	0	0	0	0	0	0	0	0	1	79	10	0	55	0	0	0	0	0	0	0	0	65	0	0	0	0	0	0	0	0	0	1	0	0
	4050	86	5	0	0	0	0	0	0	0	0	0	0	0	0	0	0	0	0	0	0	0	0	1	92	5	0	30	0	0	0	0	0	0	0	0	35	0	0	0	0	0	0	0	0	0	0	0	0
	4062	86	0	0	0	0	0	0	0	0	0	0	0	0	0	0	1	11	0	0	0	0	0	0	98	5	0	45	0	0	0	0	0	0	0	0	50	0	0	0	0	0	0	0	0	0	0	0	0
	4071	54	10	0	0	0	0	0	0	0	0	0	0	0	0	0	0	18	0	0	0	0	0	2	84	15	0	40	0	0	0	0	0	0	0	0	55	0	0	0	0	0	0	0	0	0	0	0	0
	4086	70	5	0	0	0	0	0	0	0	0	0	0	0	0	0	0	5	0	0	0	0	0	0	80	5	0	45	0	0	0	0	0	0	0	0	50	0	0	0	0	0	0	0	0	0	0	0	0
	4095	55	9	0	0	0	0	0	0	0	0	0	0	0	0	0	0	0	0	0	0	0	0	1	65	21	0	10	0	0	0	0	0	0	10	0	41	0	0	0	0	0	0	0	0	0	0	0	0
	4104	72	10	0	0	0	0	0	0	0	0	0	0	0	0	0	5	16	0	0	0	0	0	0	103	10	0	25	0	0	0	0	0	0	2	0	37	0	0	0	0	0	0	0	0	0	0	0	0
	4110	55	5	0	0	0	0	0	0	0	0	0	0	0	0	0	0	6	0	0	0	0	0	6	72	12	0	53	0	0	0	0	0	0	0	0	65	0	0	0	0	0	0	0	0	0	0	0	0
	4119	70	10	0	0	0	0	0	0	0	0	0	0	0	0	0	0	6	0	0	0	0	0	0	86	0	0	45	10	0	0	0	0	0	0	0	55	0	0	0	0	0	0	0	0	0	0	0	0
	4125	75	0	0	0	0	0	0	0	0	0	0	0	0	0	0	0	6	0	0	0	0	0	0	81	10	0	30	0	0	0	0	0	0	10	0	50	0	0	0	0	0	0	0	0	0	0	0	0
	4137	62	5	0	0	0	0	0	0	0	0	0	0	0	0	0	1	3	0	0	0	0	0	7	78	12	0	20	10	0	0	0	0	0	5	0	47	0	0	0	0	0	0	0	0	0	0	0	0
	4149	68	5	0	0	0	0	0	0	0	0	0	0	0	0	0	13	2	0	0	0	0	0	1	89	15	0	30	0	0	0	0	0	0	0	0	45	0	0	0	0	0	0	0	0	0	0	0	0
	4158	66	3	0	0	0	0	0	0	0	0	0	0	0	0	0	0	10	0	0	0	0	0	0	79	0	0	45	5	0	0	0	0	0	0	0	50	0	0	0	0	0	0	0	0	0	0	0	0
	4176	50	20	0	0	0	0	0	0	0	0	0	0	0	0	0	0	11	0	0	0	0	0	1	82	10	0	22	1	0	0	0	0	0	20	0	53	0	0	0	0	0	0	0	0	0	0	0	0
	4188	60	0	0	0	0	0	0	0	0	0	0	0	0	0	0	1	1	0	0	0	0	0	0	62	20	0	40	0	0	0	0	0	0	0	0	60	0	0	0	0	0	0	0	0	0	0	0	0
	4200	65	12	0	0	0	0	0	0	0	0	0	0	0	0	0	2	0	0	0	0	0	0	2	81	17	0	10	0	0	0	0	0	0	11	0	38	0	0	0	0	0	0	0	0	0	0	0	0
	4218	15	0	0	0	0	0	0	0	0	0	0	0	0	0	0	3	13	0	0	0	0	0	2	33	10	0	0	0	0	0	0	0	0	0	0	10	0	0	0	0	0	0	0	0	0	0	0	0
	4233	0	0	0	0	0	0	0	0	0	0	0	0	0	0	0	0	0	0	0	0	0	0	0	0	0	0	0	1	0	0	0	0	0	0	0	1	0	0	0	0	0	0	0	0	0	0	0	0
	4239	65	0	0	0	0	0	0	0	0	0	0	0	0	0	0	1	0	0	0	0	0	0	1	67	5	0	35		0	0	0	0	0	0	0	40	0	0		0	0	0	0	0	0	0	0	0
	4251	88	12	0	0	0	0	0	0	0	0	0	0	0	0	0	0	0	0	0	0	0	0	0	100	10	0	20	2	0	0	0	0	0	10	0	42	0	0	0	0	0	0	0	0	0	0	0	0
	4263	47	15	0	0	0	0	0	0	0	0	0	0	0	0	0	0	0	0	0	0	0	0	2	64	35	0	15	2	0	0	0	0	0	10	1	63	0	0	0	0	0	0	0	0	0	0	0	0
	4272	60	0	0	0	0	0	0	0	0	0	0	0	0	0	0	0	0	0	0	0	0	0	0	60	40	0	15	1	0	0	0	0	0	5	0	61	0	0	0	0	0	0	0	0	0	0	0	0
	4281	85	0	0	0	0	0	0	0	0	0	0	0	0	0	0	0	0	0	0	0	0	0	1	86	65	0	0	0	0	0	0	0	0	2	1	68	0	0	0	0	0	0	0	0	0	0	0	0
	4293	55	5	0	0	0	0	0	0	0	0	0	0	0	0	0	12	2	0	0	0	0	0	0	74	0	0	25	1	0	0	0	0	0	1	1	28	0	0	0	0	0	0	0	0	0	0	0	0
	4305	57	3	0	0	0	0	0	0	0	0	0	0	0	0	0	0	12	0	0	0	0	0	0	72	0	0	40	10	0	0	0	0	0	0	6	56	0	0	0	0	0	0	0	0	0	0	0	0
	4314	75	10	0	0	0	0	0	0	0	0	0	0	0	0	0	0	10	0	0	0	0	0	0	95	0	0	35	2	0	0	5	0	0	0	2	44	0	0	0	0	0	0	0	0	0	0	0	0
	4326	55	0	0	0	0	0	0	0	0	0	0	0	0	0	0	0	5	0	0	0	0	0	0	60	0	0	60	6	0	0	0	0	0	0	2	68	0	0	0	0	0	0	0	0	0	0	0	0
	4344	70	10	0	0	0	0	0	0	0	0	0	0	0	0	0	0	0	0	0	0	0	0	5	85	0	0	50	5	0	0	0	0	0	5	1	61	0	0	0	0	0	0	0	0	0	0	0	0
	4357	71	0	0	0	0	0	0	0	0	0	0	0	0	0	0	0	0	0	0	0	0	0	1	72	0	0	45	1	0	0	0	0	0	0	2	48	0	0	0	0	0	0	0	0	0	0	0	0
	4360	82	0	0	0	0	0	0	0	0	0	0	0	0	0	0	0	2	0	0	0	0	0	6	90	0	0	55	0	0	0	0	0	0	0	0	55	0	0	0	0	0	0	0	0	0	0	0	0
Falak-21 well, Shushan Basin	3570	11	0	9	0	0	1	13	3	1	1	7	5	2	3	0	2	2	18	1	1	5	0	2	87	17	10	6	0	0	2	0	11	0	0	0	46	2	0	0	0	0	0	0	0	0	0	0	0
	3630	1	0	0	0	0	0	1	0	0	0	0	0	2	0	0	0	1	0	0	0	0	0	0	5	0	0	1	0	0	0	0	3	0	0	0	4	0	0	0	0	0	0	0	0	0	0	0	0
	3666	2	0	0	0	0	0	1	0	0	2	2	0	0	0	0	2	3	0	0	0	0	0	0	12	1	0	1	0	0	0	0	0	0	0	0	2	0	0	0	0	0	0	0	0	0	0	0	0
	3682	5	0	8	0	0	0	12	0	3	4	5	6	6	0	0	10	14	7	0	3	1	4	0	88	9	4	7	0	5	1	1	9	0	0	0	36	1	0	0	0	0	0	0	0	0	1	0	2
	3688	0	0	0	0	0	0	3	0	0	2	0	0	4	0	0	4	2	0	0	2	0	0	0	17	0	1	0	0	0	0	0	2	0	0	0	3	0	0	0	0	0	0	0	0	0	0	0	0
	3765	4	0	5	0	0	0	3	2	0	1	11	7	6	3	0	5	10	10	0	1	2	5	6	81	7	12	9	0	1	2	1	4	0	0	0	36	0	0	0	0	0	0	0	0	1	0	0	0
	3780	2	0	0	0	0	0	2	0	0	0	0	0	2	0	0	0	0	2	0	0	0	0	0	8	2	3	3	0	1	0	0	2	0	0	0	11	0	0	0	0	0	0	0	0	0	0	0	0
	3790	2	0	0	0	0	0	0	0	0	2	0	0	0	0	0	1	1	0	1	0	0	0	0	7	3	0	0	0	0	0	0	4	0	0	0	7	0	0	0	0	0	0	0	0	0	0	0	0
	3880	0	0	0	0	0	0	0	0	0	0	0	0	0	0	0	0	0	0	0	0	0	0	0	0	1	1	0	0	0	0	0	1	0	0	0	3	0	0	0	0	0	0	0	0	0	0	0	0
	3905	0	0	0	0	0	0	0	0	0	0	0	0	0	0	0	0	0	0	0	0	0	0	0	0	0	0	0	0	0	0	0	0	0	0	0	0	0	0	0	0	0	0	0	0	0	0	0	0
	4026	0	0	0	0	0	0	0	0	0	0	0	1	0	0	0	0	0	1	0	0	0	0	0	2	1	0	0	0	1	0	0	1	0	0	0	3	0	0	0	0	0	0	0	0	0	0	0	0
	4035	0	0	0	0	0	0	0	0	0	1	0	0	2	0	0	0	1	0	0	0	0	0	2	6	4	1	0	0	0	0	0	2	0	0	0	7	0	0	0	0	0	0	0	0	0	0	0	0
	4038	0	0	0	0	0	0	2	0	0	0	0	0	1	0	0	0	0	0	0	0	1	0	0	4	1	0	2	0	0	0	0	3	0	0	0	6	0	0	0	0	0	0	0	0	0	0	0	0
[truncated: 45 more columns]
