# Supplementary material for: Organic Matter Assessment and Paleoenvironmental Changes of the Middle Jurassic Main Source Rocks (Khatatba Formation) in the North Western Desert, Egypt: Palynofacies and Palynomorph Perspectives
Source: MDPI journal article supplement (doi:10.3390/min13040548), 2023-04-13
Supplement: s1 [file s1 › minerals-2299934 - Table S2 xml.xlsx]

## Sheet: Sheet1
Basin	Well name	Sample Depth (m)	Translucent phytoclasts	Opaque phytoclasts	total phytoclasts	AOM	Palynomorphs	Total POM	Palynofacies field	Dinocyst	Pollen grains	Spores	MFTLs	Acritarch	Total palynomorphs	M:T ratio
Shushan	Falak-21	3570	3.4	20.2	23.6	74	2.4	100	IX	47.2	16.2	33.1	3.2	0.4	100.1	1.03043
Shushan	Falak-21	3630	0	37	37	61.8	1.2	100	IX	42.1	21.1	26.3	10.5	0	100	1.1097
Shushan	Falak-21	3666	3.2	68.6	71.8	27.6	0.6	100	II	11.8	11.8	70.5	5.9	0	100	0.215067
Shushan	Falak-21	3682	5.4	41.2	46.6	51	2.4	100	VI	39.3	15.4	41	3.9	0.4	100	0.77305
Shushan	Falak-21	3688	3.4	79.2	82.6	16.3	1	99.9	II	0	13.6	86.4	0	0	100	0
Shushan	Falak-21	3765	8	56.2	64.2	32.6	2.8	99.6	II	31.4	19.1	46.8	2.7	0	100	0.517451
Shushan	Falak-21	3780	0.8	70.4	71.2	28	0.8	100	II	0	57.9	42.1	0	0	100	0
Shushan	Falak-21	3790	6.4	67.2	73.6	25.2	1.2	100	II	0	50	50	0	0	100	0
Shushan	Falak-21	3880	0	77.2	77.2	22	0.8	100	II	50	50	0	0	0	100	1
Shushan	Falak-21	3905	0.4	90.2	90.6	9	0	99.6	II	0	0	0	0	0	0
Shushan	Falak-21	4026	0.4	55	55.4	44.2	0.4	100	VI	0	66.7	33.3	0	0	100	0
Shushan	Falak-21	4035	0.8	91.2	92	6.8	1.2	100	II	18.8	43.7	37.5	0	0	100	0.231527
Shushan	Falak-21	4038	4	85.8	89.8	9.2	1	100	II	25	37.5	25	12.5	0	100	0.6
Matruh	OBA D-8	3750	14	20	34	60	6	100	IX	89	9	0	2	0	100	10.1111
Matruh	OBA D-8	3760	20	12	32	58	10	100	VI	95	2	0	3	0	100	49
Matruh	OBA D-8	3790	20	10	30	65	5	100	IX	96	4	0	0	0	100	24
Matruh	OBA D-8	3800	22	17	39	49	12	100	VII	95	5	0	0	0	100	19
Matruh	OBA D-8	3810	27	17	44	48	8	100	VI	89	10	0	1	0	100	9
Matruh	OBA D-8	3820	36	10	46	45	9	100	VI	96	4	0	0	0	100	24
Matruh	OBA D-8	3845	40	20	60	26	14	100	II	98	2	0	0	0	100	49
Matruh	OBA D-8	3860	42	26	68	20	12	100	II	100	0	0	0	0	100
Matruh	OBA D-8	3880	42	30	72	20	8	100	II	100	0	0	0	0	100
Matruh	OBA D-8	3900	27	32	59	28	13	100	II	100	0	0	0	0	100
Matruh	OBA D-8	3915	33	25	58	33	9	100	II	100	0	0	0	0	100
Matruh	OBA D-8	3920	41	6	47	40	13	100	Ivb	100	0	0	0	0	100
Matruh	OBA D-8	3930	40	15	55	31	14	100	II	100	0	0	0	0	100
Matruh	OBA D-8	3940	55	7	62	26	12	100	II	100	0	0	0	0	100
Matruh	OBA D-8	4015	26	19	45	44	11	100	IVb	100	0	0	0	0	100
Matruh	OBA D-10	3904	5	40	45	50	5	100	VI	30	20	50	0	0	100	0.428571
Matruh	OBA D-10	3906	27	25	52	39	9	100	VI	37.5	20.5	42	0	0	100	0.6
Matruh	OBA D-10	3908	28	20	48	46	6	100	VI	45	10.5	44.5	0	0	100	0.818182
Matruh	OBA D-10	3910	10	38	48	48	4	100	VI	47	19	34	0	0	100	0.886792
Matruh	OBA D-10	3912	9	49	58	39	3	100	VI	35	22	43	0	0	100	0.538462
Matruh	OBA D-10	3914	17	45	62	28	10	100	II	44	21	35	0	0	100	0.785714
Matruh	OBA D-10	3916	18	34	52	39	9	100	II	45	18	37	0	0	100	0.818182
Matruh	OBA D-10	3918	22	38	60	32	8	100	II	60	20	20	0	0	100	1.5
Matruh	OBA D-10	3924	28	25	53	40	7	100	VI	60	16	24	0	0	100	1.5
Matruh	OBA D-10	3926	32	39	71	23	6	100	II	61	23.5	15.5	0	0	100	1.5641
Matruh	OBA D-10	3928	38	27	65	27	8	100	II	63	12.5	24.5	0	0	100	1.7027
Matruh	OBA D-10	3938	43	25	68	26	6	100	II	71.0383	11.4754	17.4863	0	0	100	2.45283
Matruh	OBA D-10	3940	43	25	68	25	7	100	II	60.9195	6.32184	32.7586	0	0	100	1.55882
Matruh	OBA D-10	3966	57	25	82	10	8	100	II	66.6667	20.155	13.1783	0	0	100	2
Matruh	OBA D-10	3968	49	28	77	18	5	100	II	67.2222	19.4444	13.3333	0	0	100	2.05085
Matruh	OBA D-10	3970	44	26	70	26	4	100	II	67.7419	11.828	20.4301	0	0	100	2.1
Matruh	OBA D-10	3972	30	30	60	30	10	100	II	58	16.5	25.5	0	0	100	1.38095
Matruh	OBA D-10	3974	43	11	54	35	11	100	IVb	68.7023	19.8473	11.4504	0	0	100	2.19512
Matruh	OBA D-10	3976	40	15	55	30	15	100	II	77.5	11.5	11	0	0	100	3.44444
Matruh	OBA D-10	3988	30	29	59	35	6	100	VI	80.292	9.48905	10.219	0	0	100	4.07407
Matruh	OBA D-10	3990	30	21	51	40	9	100	VI	79.8165	15.5963	4.58716	0	0	100	3.95455
Matruh	OBA D-10	3996	35	34	69	20	11	100	II	88.9571	9.20245	1.84049	0	0	100	8.05556
Matruh	OBA D-10	3998	48	30	78	12	10	100	II	73.6264	23.0769	3.2967	0	0	100	2.79167
Matruh	OBA D-17	3760	0	19	19	69	12	100	VIII	81	19	0	0	0	100	4.26316
Matruh	OBA D-17	3780	10	20	30	60	10	100	IX	89	11	0	0	0	100	8.09091
Matruh	OBA D-17	3800	5	40	45	43	12	100	IVb	85	6	9	0	0	100	5.66667
Matruh	OBA D-17	3810	15	37	52	35	13	100	II	83	9	8	0	0	100	4.88235
Matruh	OBA D-17	3830	40	25	65	20	15	100	II	80	10	10	0	0	100	4
Matruh	OBA D-17	3850	35	20	55	30	15	100	II	83	9	9	0	0	101	4.61111
Matruh	OBA D-17	3870	20	35	55	26	19	100	IVa	90	10	0	0	0	100	9
Matruh	OBA D-17	3900	22	35	57	30	13	100	II	93	7	0	0	0	100	13.2857
Matruh	OBA D-17	3920	5	55	60	30	10	100	II	89	11	0	0	0	100	8.09091
Matruh	OBA D-17	3935	0	90	90	10	0	100	II	100	0	0	0	0	100
Matruh	OBA D-17	3960	0	60	60	40	0	100	II	0	0	0	0	0	0
Matruh	OBA D-17	3970	0	70	70	30	0	100	II	0	0	0	0	0	0
Matruh	OBA D-17	3992	0	60	60	40	0	100	VI	0	0	0	0	0	0
Matruh	OBA D-17	4000	0	65	65	35	0	100	VI	0	0	0	0	0	0
Dahab-Mireir	THAX-1	3771	18	35	53	42	5	100	VI	13	20	67	0	0	100	0.149425
Dahab-Mireir	THAX-1	3777	16	28	44	40	16	100	Ivb	38	22	40	0	0	100	0.612903
Dahab-Mireir	THAX-1	3786	21	24	45	46	9	100	VI	29	14	57	0	0	100	0.408451
Dahab-Mireir	THAX-1	3795	28	17	45	45	10	100	VI	67	11	22	0	0	100	2.0303
Dahab-Mireir	THAX-1	3807	41	28	69	28	3	100	II	39	10	51	0	0	100	0.639344
Dahab-Mireir	THAX-1	3822	30	20	50	39	11	100	Ivb	24	20	56	0	0	100	0.315789
Dahab-Mireir	THAX-1	3849	40	15	55	35	10	100	VI	12	16	72	0	0	100	0.136364
Dahab-Mireir	THAX-1	3858	44	20	64	23	13	100	II	16	24	60	0	0	100	0.190476
Dahab-Mireir	THAX-1	3873	35	7	42	53	5	100	VI	36	8	56	0	0	100	0.5625
Dahab-Mireir	THAX-1	3890	35	12	47	43	10	100	VI	19	16	65	0	0	100	0.234568
Dahab-Mireir	THAX-1	3894	43	17	60	23	17	100	Iva	18	12	70	0	0	100	0.219512
Dahab-Mireir	THAX-1	3909	50	22	72	13	15	100	II	11	27	62	0	0	100	0.123596
Dahab-Mireir	THAX-1	3924	53	27	80	15	5	100	II	15	27	58	0	0	100	0.176471
Dahab-Mireir	THAX-1	3930	52	15	67	29	4	100	II	7	31	62	0	0	100	0.0752688
Dahab-Mireir	THAX-1	3942	55	14	69	28	3	100	II	13	29	58	0	0	100	0.149425
Dahab-Mireir	THAX-1	3966	52	10	62	26	12	100	II	33	15	52	0	0	100	0.492537
Dahab-Mireir	THAX-1	3972	53	20	73	20	7	100	II	20	25	55	0	0	100	0.25
Dahab-Mireir	THAX-1	3990	42	19	61	31	8	100	II	19	20	61	0	0	100	0.234568
Dahab-Mireir	THAX-1	4008	38	6	44	48	8	100	VI	26	0	74	0	0	100	0.351351
Dahab-Mireir	THAX-1	4020	48	10	58	31	11	100	II	22	20	58	0	0	100	0.282051
Dahab-Mireir	THAX-1	4038	28	7	35	50	15	100	VII	33	17	50	0	0	100	0.492537
Dahab-Mireir	THAX-1	4041	30	15	45	41	14	100	Ivb	29	32	39	0	0	100	0.408451
Dahab-Mireir	THAX-1	4050	48	14	62	27	11	100	II	37	17	46	0	0	100	0.587302
Dahab-Mireir	THAX-1	4062	56	20	76	12	12	100	II	26	25	49	0	0	100	0.351351
Dahab-Mireir	THAX-1	4071	55	15	70	15	15	100	II	31	27	42	0	0	100	0.449275
Dahab-Mireir	THAX-1	4086	60	12	72	17	11	100	II	35	25	40	0	0	100	0.538462
Dahab-Mireir	THAX-1	4095	50	19	69	22	9	100	II	44	20	32	0	4	100	0.923077
Dahab-Mireir	THAX-1	4104	52	18	70	25	5	100	II	30	18	51	0	1	100	0.449275
Dahab-Mireir	THAX-1	4110	49	22	71	17	12	100	II	29	32	36	0	3	100	0.470588
Dahab-Mireir	THAX-1	4119	54	19	73	11	16	100	Iva	27	27	43	0	3	100	0.428571
Dahab-Mireir	THAX-1	4125	59	15	74	15	11	100	II	33	25	40	0	2	100	0.538462
Dahab-Mireir	THAX-1	4137	55	15	70	18	12	100	II	32	23	39	0	6	100	0.612903
Dahab-Mireir	THAX-1	4149	56	12	68	20	12	100	II	33	22	44	0	1	100	0.515152
Dahab-Mireir	THAX-1	4158	44	22	66	20	14	100	II	30	25	39	0	6	100	0.5625
Dahab-Mireir	THAX-1	4176	65	10	75	15	10	100	II	30	26	41	0	3	100	0.492537
Dahab-Mireir	THAX-1	4188	54	15	69	17	14	100	II	36	30	31	0	3	100	0.639344
Dahab-Mireir	THAX-1	4200	45	20	65	30	5	100	II	38	19	40	0	3	100	0.694915
Dahab-Mireir	THAX-1	4218	53	25	78	20	2	100	II	13	18	58	0	11	100	0.315789
Dahab-Mireir	THAX-1	4233	48	31	79	18	3	100	II	50	50	0	0	0	100	1
Dahab-Mireir	THAX-1	4239	52	30	82	13	5	100	II	40	20	33	0	7	100	0.886792
Dahab-Mireir	THAX-1	4251	54	25	79	15	6	100	II	18	21	50	0	11	100	0.408451
Dahab-Mireir	THAX-1	4263	47	25	72	18	10	100	II	29	31	32	0	8	100	0.587302
Dahab-Mireir	THAX-1	4272	46	28	74	20	6	100	II	29	30	30	0	11	100	0.666667
Dahab-Mireir	THAX-1	4281	45	22	67	18	15	100	II	23	34	43	0	0	100	0.298701
Dahab-Mireir	THAX-1	4293	52	30	82	10	8	100	II	38	14	37	0	11	100	0.960784
Dahab-Mireir	THAX-1	4305	48	24	72	11	17	100	Iva	31	28	36	0	5	100	0.5625
Dahab-Mireir	THAX-1	4314	50	35	85	5	10	100	II	23	22	47	0	8	100	0.449275
Dahab-Mireir	THAX-1	4326	60	20	80	10	10	100	II	30	34	30	0	6	100	0.5625
Dahab-Mireir	THAX-1	4344	57	22	79	15	6	100	II	17	30	42	0	11	100	0.388889
Dahab-Mireir	THAX-1	4357	65	13	78	10	12	100	II	33	24	36	0	7	100	0.666667
Dahab-Mireir	THAX-1	4360	64	10	74	12	14	100	II	28	27	45	0	0	100	0.388889
